# Supplementary material for: MoO3 Thickness, Thermal Annealing and Solvent Annealing Effects on Inverted and Direct Polymer Photovoltaic Solar Cells
Source: Materials (Basel). 2012 Nov 27;5(12):2521–36. doi: 10.3390/ma5122521 (PMC5449054; doi:10.3390/ma5122521)

# Supplementary Information

## AFM

AFM images of Glass/ITO/TiO<sub>x</sub>/P3HT:PCBM and Glass/ITO/TiO<sub>x</sub>/P3HT:PCBM/MoO<sub>3</sub> before and after thermal annealing (170°C – 10 min) are shown on Figure S1. The MoO<sub>3</sub> layer is 15 nm-thick and the RMS roughness was evaluated on a 2 μm × 2 μm area.

The RMS roughness of Glass/ITO/TiO<sub>x</sub>/P3HT:PCBM is 1.4 and 2.0 nm respectively before (S1-A) and after (S1-C) annealing. For Glass/ITO/TiO<sub>x</sub>/P3HT:PCBM/MoO<sub>3</sub> samples, the RMS roughness is 1.7 and 0.7 nm respectively before (S1-B) and after (S1-D) thermal annealing.

**Figure S1.** AFM height images of Glass/ITO/TiO<sub>x</sub>/P3HT:PCBM (A, C) and Glass/ITO/TiO<sub>x</sub>/P3HT:PCBM/MoO<sub>3</sub> (B,D) before (A, B) and after (C, D) thermal annealing at 170°C for 10 min.

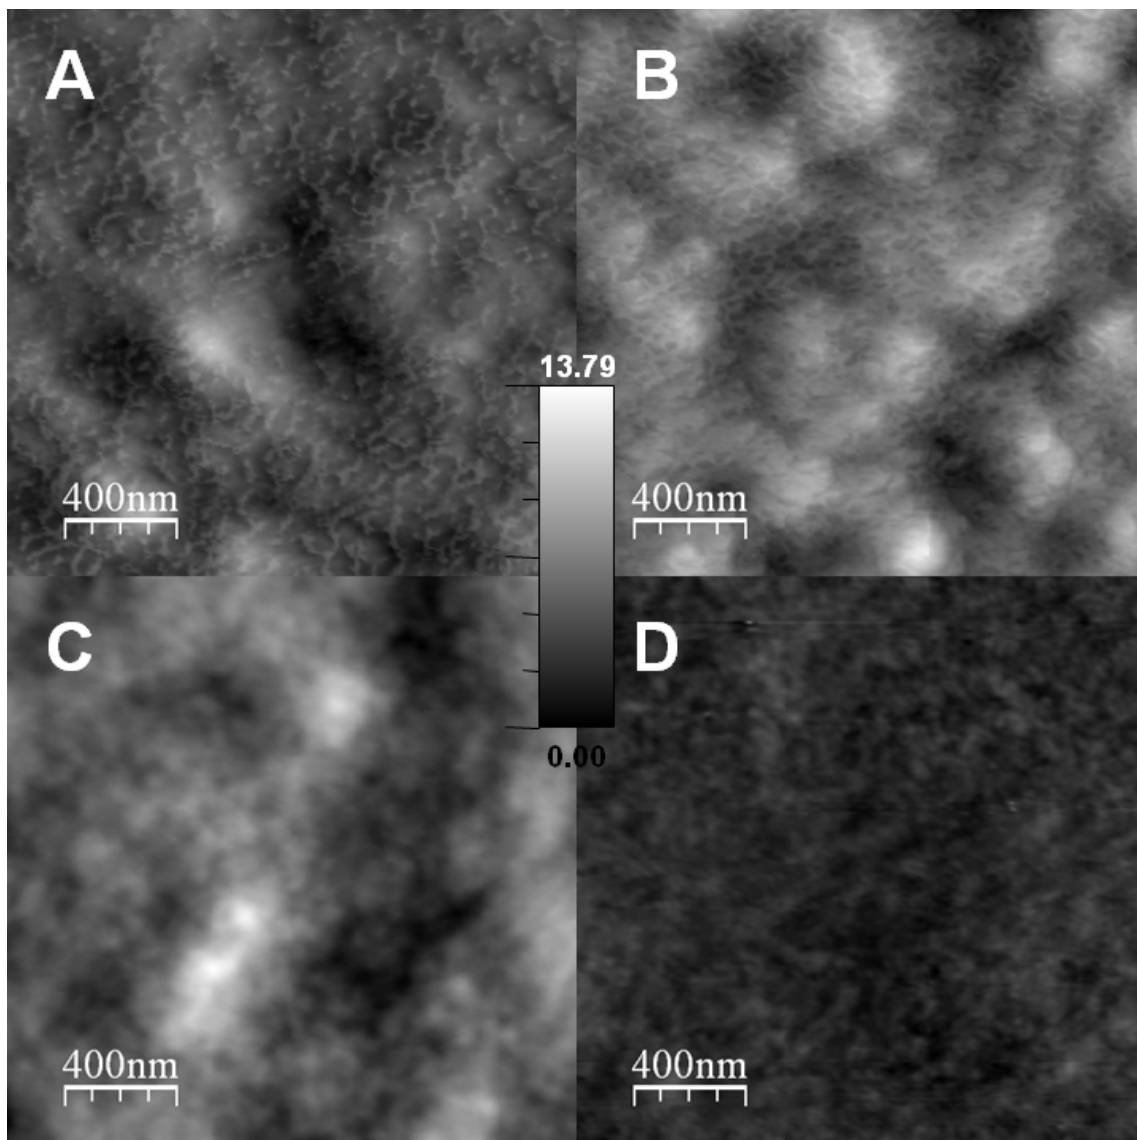

Supplement: Supplementary File 1 [file materials-05-02521-s001.pdf]
